# Supplementary figures and images for: Eleven metabolism‑related genes composed of Stard5 predict prognosis and contribute to EMT phenotype in HCC
Source: Springer Nature journal article supplement (doi:10.1186/s12935-023-03097-0), 2023-11-17

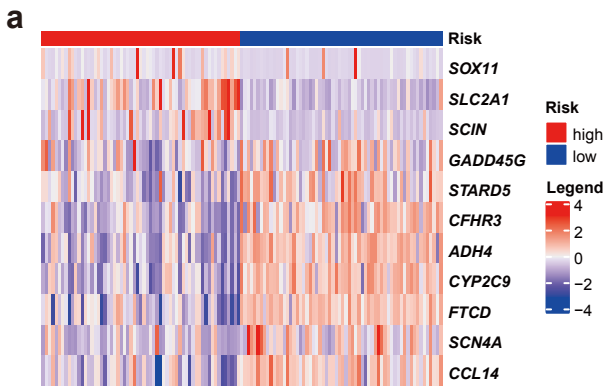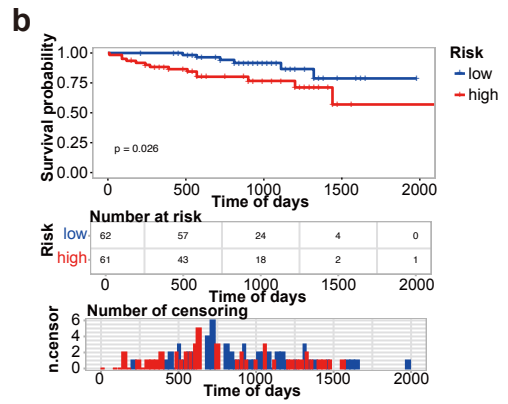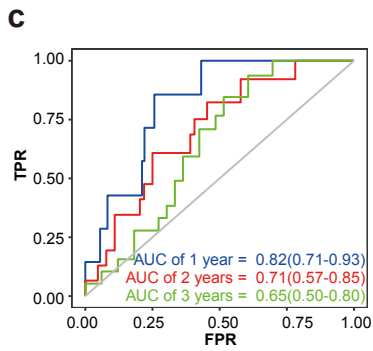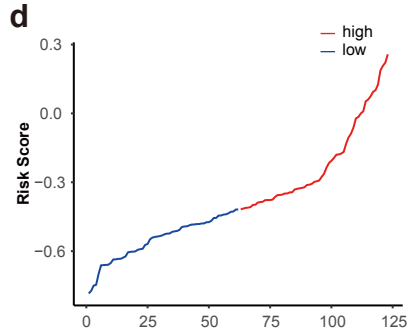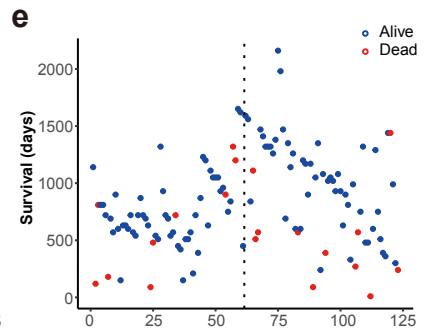

Supplement: MOESM4 [file 26317620]
